# Supplementary material for: Effects of Culture System and Substrate Composition on Micropropagated Plantlets of Two Varieties of Stevia rebaudiana Bert
Source: MDPI journal article supplement (doi:10.3390/physiologia3010006), 2023-02-02
Supplement: s1 [file s1]

Table S1. Three-way ANOVA table

|                                                  |                       | Stem length |      | Productivity |       | Shoot number |    | Dry Weight |      | Fresh Weight |       | RGR  |   | Water Percentage |      |   |       |       |   |       |       |
|--------------------------------------------------|-----------------------|-------------|------|--------------|-------|--------------|----|------------|------|--------------|-------|------|---|------------------|------|---|-------|-------|---|-------|-------|
|                                                  |                       | Mean        | S.D. |              | Mean  | S.D.         |    | Mean       | S.D. |              | Mean  | S.D. |   | Mean             | S.D. |   |       |       |   |       |       |
| Culture medium (M)                               | MS Total (N=192)      | 6.33        | 2.51 | b            | 55.12 | 29.36        | b  | 8.46       | 2.42 | b            | 0.04  | 0.03 | b | 0.34             | 0.24 | b | 0.038 | 0.026 | b | 84.90 | 14.74 |
|                                                  | MSM Total (N=200)     | 5.52        | 2.25 | a            | 49.84 | 31.67        | ab | 8.76       | 3.74 | b            | 0.03  | 0.02 | a | 0.28             | 0.18 | a | 0.031 | 0.024 | a | 85.46 | 14.52 |
|                                                  | G Total(N=200)        | 5.91        | 2.64 | ab           | 43.54 | 25.58        | a  | 7.33       | 2.77 | a            | 0.04  | 0.03 | b | 0.34             | 0.23 | b | 0.038 | 0.025 | b | 86.47 | 10.06 |
| System (S)                                       | Solid Total (N=300)   | 6.60        | 2.69 |              | 54.31 | 28.76        |    | 8.23       | 2.91 |              | 0.04  | 0.03 |   | 0.33             | 0.19 |   | 0.038 | 0.025 |   | 87.04 | 10.74 |
|                                                  | TIS Total (N=292)     | 5.21        | 2.04 |              | 44.40 | 29.06        |    | 8.12       | 3.28 |              | 0.04  | 0.03 |   | 0.30             | 0.24 |   | 0.034 | 0.026 |   | 84.17 | 15.31 |
| Variety (V)                                      | Criolla Total (N=300) | 7.02        | 2.46 |              | 51.78 | 26.32        |    | 7.18       | 2.18 |              | 0.05  | 0.03 |   | 0.40             | 0.24 |   | 0.040 | 0.026 |   | 87.23 | 9.19  |
|                                                  | Morita Total (N=292)  | 4.77        | 1.95 |              | 47.00 | 31.95        |    | 9.21       | 3.53 |              | 0.03  | 0.02 |   | 0.23             | 0.16 |   | 0.031 | 0.024 |   | 83.97 | 16.27 |
| Three-way ANOVA (general linear model) (p-value) |                       |             |      |              |       |              |    |            |      |              |       |      |   |                  |      |   |       |       |   |       |       |
| Levene Test                                      |                       | 0.000       |      |              | 0.000 |              |    | 0.000      |      |              | 0.000 |      |   | 0.000            |      |   | 0.168 |       |   | 0.000 |       |
| Main Effects                                     |                       |             |      |              |       |              |    |            |      |              |       |      |   |                  |      |   |       |       |   |       |       |
| Effect of Medium (M)                             |                       | 0.002       |      |              | 0.001 |              |    | 0.000      |      |              | 0.001 |      |   | 0.002            |      |   | 0.008 |       |   | 0.373 |       |
| Effect of System (S)                             |                       | 0.000       |      |              | 0.000 |              |    | 0.537      |      |              | 0.132 |      |   | 0.012            |      |   | 0.039 |       |   | 0.004 |       |
| Effect of Variety (V)                            |                       | 0.000       |      |              | 0.022 |              |    | 0.000      |      |              | 0.000 |      |   | 0.000            |      |   | 0.000 |       |   | 0.001 |       |
| Interactions                                     |                       |             |      |              |       |              |    |            |      |              |       |      |   |                  |      |   |       |       |   |       |       |
| ( M x S )                                        |                       | 0.000       |      |              | 0.000 |              |    | 0.000      |      |              | 0.165 |      |   | 0.767            |      |   | 0.272 |       |   | 0.763 |       |
| (M x V)                                          |                       | 0.001       |      |              | 0.000 |              |    | 0.000      |      |              | 0.000 |      |   | 0.024            |      |   | 0.001 |       |   | 0.092 |       |
| (S x V)                                          |                       | 0.001       |      |              | 0.842 |              |    | 0.001      |      |              | 0.846 |      |   | 0.000            |      |   | 0.507 |       |   | 0.000 |       |
| (M x S x V)                                      |                       | 0.107       |      |              | 0.133 |              |    | 0.073      |      |              | 0.038 |      |   | 0.002            |      |   | 0.185 |       |   | 0.004 |       |
| One-way ANOVA (general linear model) (p-value)   |                       |             |      |              |       |              |    |            |      |              |       |      |   |                  |      |   |       |       |   |       |       |
| Effect of combined treatments                    |                       |             |      |              |       |              |    |            |      |              |       |      |   |                  |      |   |       |       |   |       |       |
| (VxSxM)                                          |                       | 0.000       |      |              | 0.000 |              |    | 0.000      |      |              | 0.000 |      |   | 0.000            |      |   | 0.000 |       |   | 0.000 |       |

ANOVA. In the same variable, similar letters indicate differences statistically non-significant according to the Tukey non parametric test (HSD). Significant Effect (p < 0.05) in **bold**.
